# Supplementary material for: Systematics and Phylogenetic Placement of Panicum L. Species within the Melinidinae Based on Morphological, Anatomical, and Molecular Data (Poaceae, Panicoideae, Paniceae)
Source: MDPI journal article supplement (doi:10.3390/plants12020399), 2023-01-14
Supplement: s1 [file s1]

**Table S1.** Descriptive statistics for each separate data partition and combined matrices used in parsimony analyses.

| DNA region / dataset         | <i>ndhF</i>  | <i>rpl16</i> | <i>trnL-F</i> | Total dataset |
|------------------------------|--------------|--------------|---------------|---------------|
| Melinidinae (number of taxa) | 111          | 74           | 72            | 111           |
| Outgroup (number of taxa)    | 14           | 9            | 11            | 14            |
| Alignment length (bp)        | 2130         | 1187         | 1172          | 4490          |
| Parsimony informative sites  | 297 (13.94%) | 115 (9.68%)  | 127 (10.83%)  | 539 (12%)     |
| Tree length                  | 661          | 221          | 247           | 1174          |
| Consistency index (CI)       | 0.561        | 0.665        | 0.692         | 0.587         |
| Retention index (CR)         | 0.856        | 0.793        | 0.846         | 0.831         |

**Table S2.** Taxa, voucher information, and GenBank accession numbers for *ndhF*, *rpl16*, and *trnL-F*, respectively. Species/sequences not analyzed in [11] are indicated with an asterisk (\*); sequences obtained for this study are indicated with double asterisk (\*\*) and regions with no sequence data are indicated with a dash (-); herbarium acronyms follow [54].

| Ingroup (Melinidinae)                                  | <i>ndhF</i> | <i>rpl16</i> | <i>trnL-F</i> |
|--------------------------------------------------------|-------------|--------------|---------------|
| <i>Brachiaria ambigens</i> Chiov.*                     | MF998656*   | –            | –             |
| <i>Brachiaria humbertiana</i> A. Camus (1)*            | LN908062*   | –            | –             |
| <i>Brachiaria humbertiana</i> (2)*                     | MF998517*   | –            | –             |
| <i>Brachiaria nana</i> Stapf*                          | MF998514*   | –            | –             |
| <i>Brachiaria pseudodichotoma</i> Bosser (1)           | GU594627    | GU594521     | GU594587      |
| <i>Brachiaria pseudodichotoma</i> (2)                  | MF998520*   | –            | –             |
| <i>Brachiaria subrostrata</i> A. Camus                 | MF998492*   | –            | –             |
| <i>Brachiaria umbellata</i> (Trin.) Clayton            | MF998493*   | –            | –             |
| <i>Chaetium bromoides</i> (J. Presl) Benth.            | AY029626    | GU594519     | AF509962      |
| <i>Eriochloa acuminata</i> (J.Presl) Kunth             | GU594634    | GU594528     | GU594594      |
| <i>Eriochloa distachya</i> Kunth                       | GU594617    | GU594510     | GU594573      |
| <i>Eriochloa fatmensis</i> (Hochst. & Steud.) Clayton* | MF998531*   | HQ999912*    | –             |
| <i>Eriochloa meyeriana</i> (Nees) Pilg.                | GU594623    | GU594516     | GU594583      |
| <i>Eriochloa montevidensis</i> Griseb.                 | GU594598    | GU594491     | GU594535      |
| <i>Eriochloa nana</i> Arriaga                          | GU594605    | GU594498     | GU594553      |
| <i>Eriochloa polystachya</i> Kunth                     | GU594629    | GU594523     | GU594589      |
| <i>Eriochloa procera</i> (Retz.) C.E. Hubb. *          | MF998529*   | –            | –             |
| <i>Eriochloa punctata</i> (L.) Ham.                    | FJ486528    | FJ486555     | GU594554      |

|                                                                                                                                                                 |            |            |            |
|-----------------------------------------------------------------------------------------------------------------------------------------------------------------|------------|------------|------------|
| <i>Eriochloa sericea</i> (Scheele) Munro ex Vasey                                                                                                               | GU594635   | GU594529   | GU594595   |
| <i>Eriochloa setosa</i> (A. Rich.) Hitchc.                                                                                                                      | GU594625   | GU594518   | GU594585   |
| <i>Eriochloa subulifera</i> Stapf*                                                                                                                              | MF998530*  | –          | –          |
| <i>Eriochloa villosa</i> (Thunb.) Kunth*                                                                                                                        | KM538704*  | –          | KX372423*  |
| <i>Leucophrys mesocoma</i> (Nees) Rendle                                                                                                                        | GU594628   | GU594522   | GU594588   |
| <i>Megathyrsus infestus</i> (Andersson) B.K. Simon & S.W.L. Jacobs                                                                                              | GU594618   | GU594511   | GU594575   |
| <i>Megathyrsus maximus</i> (Jacq.) B.K. Simon & S.W.L. Jacobs                                                                                                   | LN908130*  | FJ486550   | GU594547   |
| <i>Melinis minutiflora</i> P. Beauv. (1)                                                                                                                        | FJ486524   | FJ486551   | GU594549   |
| <i>Melinis minutiflora</i> (2)                                                                                                                                  | AM849212*  | –          | –          |
| <i>Melinis minutiflora</i> (3)                                                                                                                                  | MF998508*  | –          | –          |
| <i>Melinis repens</i> (Willd.) Zizka (1)                                                                                                                        | FJ486532   | FJ486559   | GU594561   |
| <i>Melinis repens</i> (2)                                                                                                                                       | KP878958*  | KP879020*  | MT263048*  |
| <i>Moorochloa eruciformis</i> (Sm.) Veldkamp                                                                                                                    | FJ486525   | FJ486552   | GU594550   |
| <i>Moorochloa malacodes</i> (Mez & K.Schum.) Veldkamp                                                                                                           | FJ486536   | FJ486564   | GU594576   |
| <i>Panicum deustum</i> Thunb. (1)<br>= <i>Batochloa deusta</i> (Thunb.) Salariato & Zuloaga                                                                     | GU594631   | GU594525   | GU594591   |
| <i>Panicum deustum</i> (2)<br>Ethiopia, Gamu-Gofa region, <i>I. Friis</i> 9510 (K)                                                                              | OQ383273** | OQ383280** | OQ383277** |
| <i>Panicum deustum</i> (3)<br>Democratic Republic of the Congo, Beni, <i>J. Bequaert</i> 3398 (BR)                                                              | OQ383274** | –          | OQ383278** |
| <i>Panicum trichocladum</i> Hack. ex K.Schum. (1)*<br>= <i>Megathyrsus trichocladum</i> (Hack. ex K. Schum.) Salariato & Zuloaga                                | LN908153*  | –          | –          |
| <i>Panicum trichocladum</i> (2)<br>Democratic Republic of the Congo, Burundi, <i>J. Lambinon</i> 7573 (BR)                                                      | OQ383275** | OQ383281** | –          |
| <i>Panicum vollesenii</i> Renvoize*<br>= <i>Megathyrsus vollesenii</i> (Renvoize) Salariato & Zuloaga<br>Tanzania, Liwale District, <i>K. Vollesen</i> 3871 (K) | OQ383276** | OQ383282** | OQ383279** |
| <i>Rupichloa acuminata</i> (Renvoize) Salariato & Morrone                                                                                                       | FJ486540   | FJ486568   | GU594562   |
| <i>Rupichloa decidua</i> (Morrone & Zuloaga) Salariato & Morrone (1)                                                                                            | FJ486526   | FJ486553   | GU594551   |

|                                                               |           |           |           |
|---------------------------------------------------------------|-----------|-----------|-----------|
| <i>Rupichloa decida</i> (2)                                   | FJ486539  | FJ486567  | –         |
| <i>Scutachne dura</i> (Griseb.) Hitchc. & Chase               | GU594616  | GU594509  | GU594572  |
| <i>Thuarea involuta</i> (G. Forst.) R. Br. ex Sm. (1)         | GU594624  | GU594517  | GU594584  |
| <i>Thuarea involuta</i> (2)                                   | MF998491* | –         | –         |
| <i>Thuarea perrieri</i> A. Camus*                             | MF998490* | –         | –         |
| <i>Tricholaena monachne</i> (Trin.) Stapf & C.E. Hubb. (1)    | FJ486535  | FJ486563  | GU594574  |
| <i>Tricholaena monachne</i> (2)                               | HE577883* | –         | –         |
| <i>Tricholaena monachne</i> (3)                               | MF998509* | –         | –         |
| <i>Urochloa adspersa</i> (Trin.) R.D. Webster                 | GU594599  | GU594492  | GU594537  |
| <i>Urochloa arizonica</i> (Scribn. & Merr.) Morrone & Zuloaga | GU594614  | GU594507  | GU594569  |
| <i>Urochloa arrecta</i> (Hack.) Morrone & Zuloaga (1)         | FJ486517  | FJ486544  | GU594536  |
| <i>Urochloa arrecta</i> (2)                                   | MF998513* | –         | MK424972* |
| <i>Urochloa arrecta</i> (3)                                   | MF998523* | –         | MK424973* |
| <i>Urochloa bovonei</i> (Chiov.) A.M. Torres & C.M. Morton    | FJ486530  | FJ486557  | GU594557  |
| <i>Urochloa brachyura</i> (Hack.) Stapf*                      | MF998533* | HQ999943* | –         |
| <i>Urochloa brizantha</i> (A. Rich.) R.D. Webster (1)         | FJ486520  | FJ486546  | GU594542  |
| <i>Urochloa brizantha</i> (2)                                 | LN908057* | –         | –         |
| <i>Urochloa brizantha</i> (3)                                 | MF998528* | –         | –         |
| <i>Urochloa comata</i> (Hochst. ex A. Rich.) Sosef            | GU594620  | GU594513  | GU594580  |
| <i>Urochloa decumbens</i> (Stapf) R.D. Webster (1)            | FJ486529  | FJ486556  | GU594555  |
| <i>Urochloa decumbens</i> (2)                                 | MF998527* | –         | –         |
| <i>Urochloa deflexa</i> (Schumach.) H. Scholz (1)             | FJ486534  | FJ486562  | GU594571  |
| <i>Urochloa deflexa</i> (2)                                   | MF998524* | –         | –         |
| <i>Urochloa dictyoneura</i> (Fig. & De Not.) Veldkamp         | FJ486523  | FJ486549  | GU594546  |
| <i>Urochloa discifera</i> (E. Fourn.) Morrone & Zuloaga       | GU594604  | GU594497  | GU594548  |
| <i>Urochloa distachya</i> (L.) T.Q. Nguyen (1)                | FJ486518  | FJ486545  | GU594538  |
| <i>Urochloa distachya</i> (2)                                 | LN908059* | –         | –         |
| <i>Urochloa dura</i> (Stapf) A.M. Torres & C.M. Morton        | GU594610  | GU594503  | GU594564  |
| <i>Urochloa echinolaenoides</i> Stapf                         | GU59463   | GU594526  | GU594592  |

|                                                                                  |           |          |          |
|----------------------------------------------------------------------------------|-----------|----------|----------|
| <i>Urochloa foliosa</i> (R. Br.) R.D. Webster                                    | GU594619  | GU594512 | GU594578 |
| <i>Urochloa fusca</i> (Sw.) B.F. Hansen & Wunderlin                              | GU594601  | GU594494 | GU594540 |
| <i>Urochloa glumaris</i> (Trin.) Veldkamp (1)                                    | GU594626  | GU594520 | GU594586 |
| <i>Urochloa glumaris</i> (2)                                                     | MF998518* | –        | –        |
| <i>Urochloa holosericea</i> (R. Br.) R.D. Webster                                | GU594630  | GU594524 | GU594590 |
| <i>Urochloa humidicola</i> (Rendle) Morrone & Zuloaga (1)                        | FJ486521  | FJ486547 | GU594544 |
| <i>Urochloa humidicola</i> (2)                                                   | MF998526* | –        | –        |
| <i>Urochloa jubata</i> (Fig. & De Not.) Sosef                                    | FJ486531  | FJ486558 | GU594559 |
| <i>Urochloa lachnantha</i> (Hochst.) A.M. Torres & C.M. Morton                   | GU594615  | GU594508 | GU594570 |
| <i>Urochloa lata</i> (Schumach.) C.E. Hubb.                                      | FJ486533  | FJ486561 | GU594567 |
| <i>Urochloa leersioides</i> (Hochst.) A.M. Torres & C.M. Morton (1)              | GU594608  | GU594501 | GU594560 |
| <i>Urochloa leersioides</i> (2)                                                  | MF998516* | –        | –        |
| <i>Urochloa lorentziana</i> (Mez) Morrone & Zuloaga                              | FJ486522  | FJ486548 | GU594545 |
| <i>Urochloa meziana</i> (Hitchc.) Morrone & Zuloaga                              | GU594602  | GU594495 | GU594541 |
| <i>Urochloa mollis</i> (Sw.) Morrone & Zuloaga                                   | GU594597  | GU594490 | GU594534 |
| <i>Urochloa mosambicensis</i> (Hack.) Dandy (1)                                  | FJ486516  | FJ486542 | GU594532 |
| <i>Urochloa mosambicensis</i> (2)                                                | MF998522* | –        | –        |
| <i>Urochloa mutica</i> (Forssk.) T.Q. Nguyen                                     | MF998515* | GU594530 | GU594596 |
| <i>Urochloa nigropedata</i> (Munro ex Ficalho & Hiern) A.M. Torres & C.M. Morton | GU594606  | GU594499 | GU594556 |
| <i>Urochloa oblita</i> (Swallen) Morrone & Zuloaga                               | FJ486538  | FJ486566 | GU594579 |
| <i>Urochloa panicoides</i> P. Beauv. (1)                                         | FJ486519  | EU920055 | EU920056 |
| <i>Urochloa panicoides</i> (2)                                                   | MF998519* | –        | –        |
| <i>Urochloa paucispicata</i> (Morong) Morrone & Zuloaga                          | FJ486527  | FJ486554 | GU594552 |
| <i>Urochloa plantaginea</i> (Link) R.D. Webster                                  | MF998511* | FJ486543 | GU594533 |
| <i>Urochloa platynota</i> (K. Schum.) Pilg.                                      | GU594609  | GU594502 | GU594563 |
| <i>Urochloa platyphylla</i> (Munro ex C. Wright) R.D. Webster                    | GU594600  | GU594493 | GU594539 |
| <i>Urochloa ramosa</i> (L.) T.Q. Nguyen*                                         | MF998534* | –        | –        |
| <i>Urochloa reptans</i> (L.) Stapf                                               | LN908063* | –        | –        |

|                                                                       |                    |                     |                      |
|-----------------------------------------------------------------------|--------------------|---------------------|----------------------|
| <i>Urochloa rudis</i> Stapf*                                          | GU594633           | GU594527            | GU594593             |
| <i>Urochloa ruziziensis</i> (R. Germ. & C.M. Evrard) Crins            | GU594603           | GU594496            | GU594543             |
| <i>Urochloa semiundulata</i> (Hochst. ex A. Rich.) Ashal. & V.J. Nair | LN908064*          | HQ999876*           | –                    |
| <i>Urochloa serrata</i> (Thunb.) Sosef (1)                            | GU594607           | GU594500            | GU594558             |
| <i>Urochloa serrata</i> (2)                                           | MF998532*          | –                   | –                    |
| <i>Urochloa setigera</i> (Retz.) Stapf                                | GU594613           | GU594506            | GU594568             |
| <i>Urochloa subquadriflora</i> (Trin.) R.D. Webster (1)               | GU594612           | GU594505            | GU594566             |
| <i>Urochloa subquadriflora</i> (2)                                    | MF998512*          | –                   | –                    |
| <i>Urochloa subulifolia</i> (Mez) Torres Gonz. & C.M. Morton          | GU594611           | GU594504            | GU594565             |
| <i>Urochloa texana</i> (Buckley) R.D. Webster                         | FJ486537           | FJ486565            | GU594577             |
| <i>Urochloa xantholeuca</i> (Hack.) H. Scholz*                        | MF998655*          | HQ999877*           | –                    |
| <i>Yvesia madagascariensis</i> A. Camus (1)                           | MF998494*          | –                   | –                    |
| <i>Yvesia madagascariensis</i> (2)                                    | GU594636           | –                   | –                    |
| <b>Outgroup</b>                                                       | <b><i>ndhF</i></b> | <b><i>rpl16</i></b> | <b><i>trnL-F</i></b> |
| <i>Aakia tuerckheimii</i> (Hack.) J.R. Grande                         | KF982003           | –                   | –                    |
| <i>Anthaenantiopsis rojasiana</i> Parodi                              | MT180181           | KF852999            | MT180272             |
| <i>Cenchrus ciliaris</i> L.                                           | AY029625           | HQ999878            | EU940006             |
| <i>Cenchrus echinatus</i> L.                                          | AF499151           | EU931890            | EU940007             |
| <i>Cenchrus setaceus</i> (Forssk.) Morrone                            | AY029673           | –                   | EU940000             |
| <i>Panicum antidotale</i> Retz.                                       | AY188456           | –                   | –                    |
| <i>Panicum ligulare</i> Nees ex Trin.                                 | MG581772           | –                   | –                    |
| <i>Panicum miliaceum</i> L.                                           | AY188472           | –                   | JQ972957             |
| <i>Panicum repens</i> L.                                              | HE575806           | EU920053            | GU594531             |
| <i>Panicum venosum</i> Swallen                                        | GU594622           | GU594515            | GU594582             |
| <i>Paspalum notatum</i> Flügge                                        | KF852941           | KF853041            | MT180275             |
| <i>Setaria geminata</i> (Forssk.) Veldkamp                            | AY029662           | EU931861            | EU939981             |
| <i>Setaria lachnea</i> (Nees) Kunth                                   | EU741952           | EU931863            | EU939984             |
| <i>Setaria viridis</i> (L.) P. Beauv.                                 | U21976             | –                   | AF499156             |
